# Supplementary material for: PGC-1α limits angiotensin II-induced rat vascular smooth muscle cells proliferation via attenuating NOX1-mediated generation of reactive oxygen species
Source: Oxford University Press journal article supplement (doi:10.1042/bsr20150112), 2015-08-27
Supplement: bsr035e252add.pdf [file bsr035e252add.pdf]

**PGC-1 $\alpha$  Limits AngiotensinII-Induced Rat Vascular Smooth Muscle  
Cells Proliferation via Attenuating NOX1-Mediated Generation of  
Reactive Oxygen Species**

Qingbin Zhao, MD<sup>1</sup>, Junfang Zhang, MD<sup>2</sup>, Huifang Wang, MD<sup>1</sup>

<sup>1</sup>Department of Geratology, the First Affiliated Hospital of Xi'an Jiaotong University, Xi'an, Shannxi, China, <sup>2</sup>Department of Internal Medicine, Chencang Hospital, Baoji, Shannxi, China.

Running title: New role of PGC-1 $\alpha$  in VSMCs proliferation

Sources of Funding: This work was supported by National Natural Science Foundation of China (81200098) and Shanxi Province Natural Science Foundation of China (2014K11-03-04-06).

Correspondence to:

Qingbin Zhao,

Department of Geratology, the First Affiliated Hospital of Xi'an Jiaotong University, No. 277 Yanta West Road, Yanta District, Xi'an, Shannxi, 710061, China.

Tel: +86 029 85324043

Fax: +86 029 85323709

E-mail: [zhaoqingbin05@126.com](mailto:zhaoqingbin05@126.com)

## ONLINE SUPPLEMENTAL MATERIALS

### Supplemental Figures

#### Figure S1

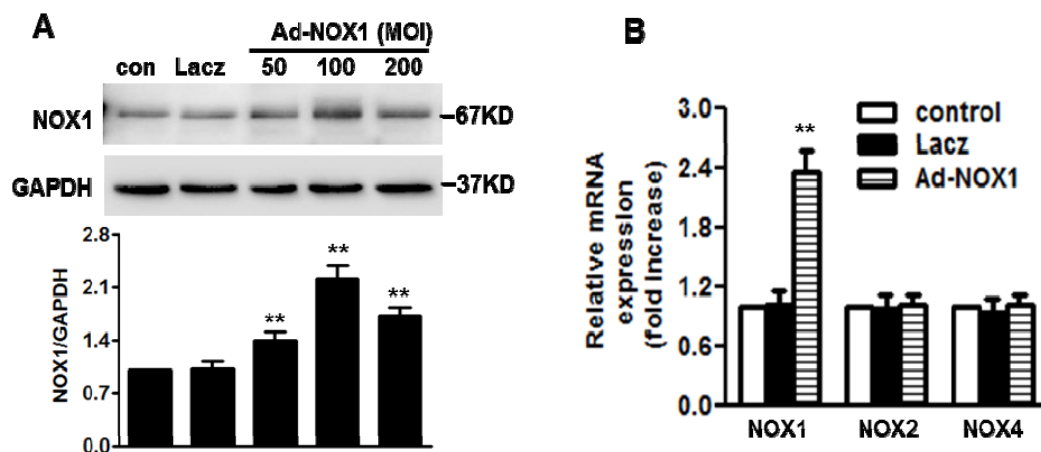

**FIGURE S1 Recombinant adenovirus encoding NOX1 cDNA (Ad-NOX1) specifically increased NOX1 expression in rat VSMCs.** (A) VSMCs were infected with various MOI of Ad-NOX1 (50, 100, 200 MOI) for 48 h. NOX1 protein expression was assessed by western blot analysis and data were shown as the ratio of NOX1/GAPDH western blot (B) Quantitative PCR analysis of NOX1, NOX2 and NOX4 mRNA level. \*\* $P < 0.01$  vs. control,  $n = 6$ .
